# Supplementary material for: Enhanced Bio-BTX Formation by Catalytic Pyrolysis of Glycerol with In Situ Produced Toluene as the Cofeed
Source: PubMed Central journal article supplement (PMC11022236; doi:10.1021/acssuschemeng.4c00451), 2024-03-25
Supplement: sc4c00451_si_001.pdf [file sc4c00451_si_001.pdf]

## Supporting Information

### Enhanced bio-BTX formation by catalytic pyrolysis of glycerol with *in-situ* produced toluene as the co-feed

Fukang Wang,<sup>a,#</sup> Thomas Sjouke Kramer,<sup>b,#</sup> Bin Yan,<sup>a</sup> Lin Zhu,<sup>a</sup> Yuezhaoh Zhu,<sup>a</sup> Andre Heeres,<sup>c</sup> Diana Ciolca,<sup>d</sup> Hero Jan Heeres,<sup>b,\*</sup> and Songbo He<sup>a,\*</sup>

<sup>a</sup>Joint International Research Laboratory of Circular Carbon, Nanjing Tech University, Nanjing 211816, PR China

<sup>b</sup>Green Chemical Reaction Engineering, Engineering and Technology Institute Groningen, University of Groningen, 9747 AG Groningen, The Netherlands

<sup>c</sup>Hanze University of Applied Sciences, 9747 AS Groningen, The Netherlands

<sup>d</sup>BioBTX BV, 9747 AA Groningen, The Netherlands

\*Corresponding authors. E-mail: [h.j.heeres@rug.nl](mailto:h.j.heeres@rug.nl) (H.J. Heeres) and [songbo.he@njtech.edu.cn](mailto:songbo.he@njtech.edu.cn) (S. He)

Number of pages: 15

Number of figures: 9

## Contents

|                                                                                                                                                                                                                                                                                                                                                  |     |
|--------------------------------------------------------------------------------------------------------------------------------------------------------------------------------------------------------------------------------------------------------------------------------------------------------------------------------------------------|-----|
| Experimental.....                                                                                                                                                                                                                                                                                                                                | S3  |
| Calculation procedure for the calculated data shown in Figs. 3, 4, S3, and S4.....                                                                                                                                                                                                                                                               | S5  |
| Figure S1. Pricing for benzene, toluene, mixed xylenes, and crude oil in 2017 - 2023. ....                                                                                                                                                                                                                                                       | S6  |
| Figure S2. Synthesis of bio-based polymers from bio-based benzene and xylenes. ....                                                                                                                                                                                                                                                              | S7  |
| Figure S3. Productivity of (a) total BTX, (b) benzene, (c) toluene, and (d) xylenes on the catalyst during the first run for catalytic conversion of glycerol (left) and co-conversion of glycerol and toluene (93/7 wt.%, right). ....                                                                                                          | S8  |
| Figure S4. Carbon yields of low-molecular-weight hydrocarbons <i>versus</i> TOS for catalytic conversion of individual glycerol (a) and toluene (c), and catalytic co-conversion of glycerol and toluene (93/7 wt.%, b). ....                                                                                                                    | S9  |
| Figure S5. Mass balance for catalytic conversion of individual glycerol (a) and toluene (c), and catalytic co-conversion of glycerol and toluene (93/7 wt.%, b).....                                                                                                                                                                             | S10 |
| Figure S6. Carbon selectivity of the individual BTX in total BTX <i>versus</i> TOS for catalytic conversion of individual glycerol (a) and toluene (c), and catalytic co-conversion of glycerol and toluene (93/7 wt.%, b). ....                                                                                                                 | S11 |
| Figure S7. Carbon yields of CO and CO <sub>2</sub> <i>versus</i> TOS for catalytic conversion of individual glycerol (a) and toluene (c), and catalytic co-conversion of glycerol and toluene (93/7 wt.%, b). ....                                                                                                                               | S12 |
| Figure S8. Overall BTX carbon yield (a), productivity of BTX on the catalyst during the first run including the toluene fraction for the recycle in co-feed (b), and productivity of BTX on the catalyst during the first run excluding the toluene fraction recycled in co-feed (c) for co-conversion of glycerol and toluene (93/7 wt.%). .... | S13 |
| Figure S9. Enhanced production of bio-BTX aromatics (in particular xylenes) for catalytic conversion of glycerol (left) by self-sufficient toluene product recycling (right). ....                                                                                                                                                               | S14 |
| References .....                                                                                                                                                                                                                                                                                                                                 | S15 |

## Experimental

**Materials.** A granular alumina bonded H-ZSM-5 catalyst (H-ZSM-5/Al<sub>2</sub>O<sub>3</sub>, 60/40 wt.%,  $\phi$  1.2 - 1.8 mm, SiO<sub>2</sub>/Al<sub>2</sub>O<sub>3</sub> molar ratio of 28) was produced at Yangzhou Baisheng Catalyst Co., Ltd., PR China. The as-received H-ZSM-5/Al<sub>2</sub>O<sub>3</sub> catalyst was calcined at 600 °C 8 h and the calcined catalyst was stored in a vacuum desiccator. Glycerol (> 99.5% purity) was supplied by Boom BV, The Netherlands. Toluene, ethanol, tetrahydrofuran (THF), and n-nonane were of analytical grade and supplied by Sigma-Aldrich. The liquid and gaseous N<sub>2</sub> were supplied by Linde.

**Catalytic (co-)pyrolysis experiemnts.** The experiments were performed on a well-engineered bench-scale fixed bed reactor setup. The fresh H-ZSM-5/Al<sub>2</sub>O<sub>3</sub> catalyst (10 g) was loaded to the isothermal zone of a stainless steel tubular reactor, of which the rest was filled with quartz wool. The reactor was heated to 550 °C under an N<sub>2</sub> flow of 50 ml min<sup>-1</sup>. The (co-)feed was pumped (10 g h<sup>-1</sup>) into a preheater (maintained at 350 °C) by using the syringe pump(s) and the gastight syringe(s). The vapor mixed with N<sub>2</sub> gas was first passed to the vent to purge the system for *ca.* 2 h and then introduced to the catalyst reactor. The reactions were continuously performed for a TOS of 12 h. Liquid samples (collected in a 20-ml glass vial) and gas-phase samples (collected in a 5-L FlexFoil Plus sample bag) were taken every 30 min.

**Product analysis.** The liquid products collected in the 20-ml glass vials were diluted approximately 7 times with a stock solution (*ca.* 20,000 ppm of *n*-nonane in a mixed solvent containing THF and ethanol with a volume ratio of *ca.* 1 to 10) to prepare homogeneous samples for various off-line analyses. The mixtures were analyzed by GC-MS (6890/5973, Hewlett-Packard) and GC-FID (5890, Hewlett-Packard) equipped with a Rtx-1701 column (30 m × 0.25 mm × 0.25  $\mu$ m, Restek). The relative response factors of the individual aromatics to the internal standard, *viz.*, *n*-nonane, were applied for the quantification of aromatics. The carbon, hydrogen, and oxygen contents in the samples were analyzed using a EuroEA3000 elemental analyzer (Eurovector). The gaseous products collected in the 5-L gas bags were analyzed by GC-TCD (5890, Hewlett-Packard) equipped with a CP-PoraBOND Q column (50 m × 0.53 mm × 10  $\mu$ m, Varian) and an HP-Molsieve column (30m x 0.53 mm x 50  $\mu$ m, Agilent). Before and after the analyses, the GC-TCD was pre- and post-calibrated with a standard reference gas mixture containing C<sub>1</sub>-C<sub>3</sub>, CO, CO<sub>2</sub>, and N<sub>2</sub>. The carbon yields of products, the

selectivity of individual BTX components, and BTX productivity on the catalyst during the first run were calculated using **Equations 1-3**.

$$\text{Yield (\%, on carbon basis)} = \frac{\text{mol of carbon in the individual product}}{\text{mol of carbon in the feed}} \times 100 \quad (1)$$

$$\text{BTX selectivity (\%)} = \frac{\text{mol of individual BTX component produced}}{\text{mol of total BTX product}} \times 100 \quad (2)$$

$$\text{BTX productivity (mg}_{BTX} \text{ g}_{catalyst}^{-1}) = \frac{\text{weight of BTX produced}}{\text{weight of catalyst loaded in the reactor}} \quad (3)$$

## Calculation procedure for the calculated data shown in Figs. 3, 4, S3, and S4

The following general calculation equation was used:

Calculated carbon yield of the co-feed = Experimental performance data of Feed A × carbon fraction (C.%) of Feed A in the co-feed + Experimental performance data of Feed B × carbon fraction (C.%) of Feed B in the co-feed

The mass ratio of glycerol and toluene in the co-feed was 93/7 wt.%.

The carbon ration of glycerol and toluene in the co-feed was 85/15 C.%.

### Calculated data in Figs. 3 and S3

|                                            | Glycerol<br>(Experimental) | Toluene<br>(Experimental) | Glycerol/Toluene (85/15 C.%)<br>(Calculated) |
|--------------------------------------------|----------------------------|---------------------------|----------------------------------------------|
| Carbon yield of benzene (C.%) <sup>#</sup> | 4.4                        | 26.7                      | $4.4 \times 0.85 + 26.7 \times 0.15 = 7.7$   |
| Carbon yield of toluene (C.%) <sup>#</sup> | 9.5                        | 41.3                      | $9.5 \times 0.85 + 41.3 \times 0.15 = 14.3$  |
| Carbon yield of xylenes (C.%) <sup>#</sup> | 5.3                        | 15.7                      | $5.3 \times 0.85 + 15.7 \times 0.15 = 6.8$   |

<sup>#</sup>The average value of the carbon yields at TOS of 1.5, 2, and 2.5 h.

### Calculated data in Fig. 4

|                                       | Glycerol<br>(Experimental) | Toluene<br>(Experimental) | Glycerol/Toluene (85/15 C.%)<br>(Calculated) |
|---------------------------------------|----------------------------|---------------------------|----------------------------------------------|
| Overall carbon yield of benzene (C.%) | 2.1                        | 22.1                      | $2.1 \times 0.85 + 22.1 \times 0.15 = 5.1$   |
| Overall carbon yield of toluene (C.%) | 5.3                        | 46.2                      | $5.3 \times 0.85 + 46.2 \times 0.15 = 11.4$  |
| Overall carbon yield of xylenes (C.%) | 3.6                        | 16.4                      | $3.6 \times 0.85 + 16.4 \times 0.15 = 5.5$   |

### Calculated data in Fig. S4

|                                                                                                       | Glycerol<br>(Experimental) | Toluene<br>(Experimental) | Glycerol/Toluene (93/7 wt.%)<br>(Calculated) |
|-------------------------------------------------------------------------------------------------------|----------------------------|---------------------------|----------------------------------------------|
| Productivity of benzene on the catalyst during the first run ( $\text{mg g}^{-1}_{\text{catalyst}}$ ) | 79                         | 1859                      | $79 \times 0.93 + 1859 \times 0.07 = 204$    |
| Productivity of toluene on the catalyst during the first run ( $\text{mg g}^{-1}_{\text{catalyst}}$ ) | 206                        | 3926                      | $206 \times 0.93 + 3926 \times 0.07 = 466$   |
| Productivity of xylenes on the catalyst during the first run ( $\text{mg g}^{-1}_{\text{catalyst}}$ ) | 141                        | 1409                      | $141 \times 0.93 + 1409 \times 0.07 = 230$   |

BTX prices are collected from the weekly report of Ethanol Market and Pricing Data by U.S. Grains Council.  
The reports are available at [https://grains.org/ethanol\\_report/](https://grains.org/ethanol_report/)

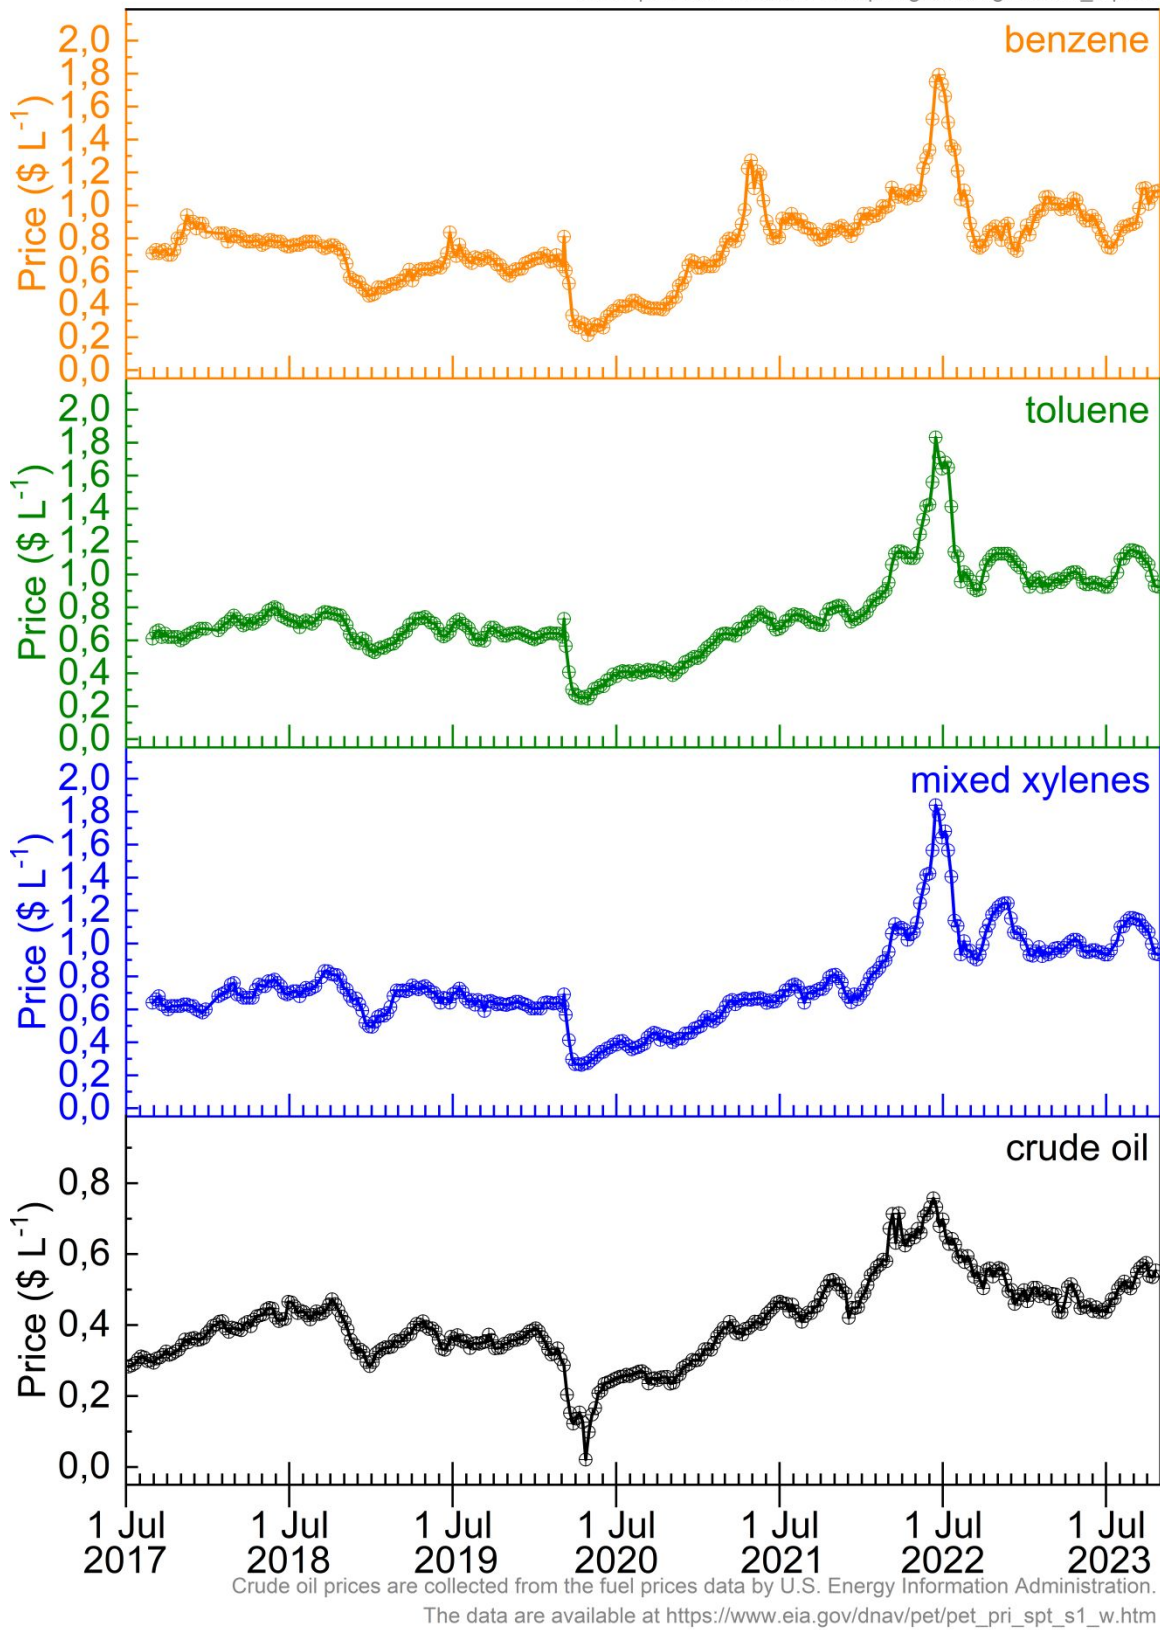

**Figure S1.** Pricing for benzene, toluene, mixed xylenes, and crude oil in 2017 - 2023.<sup>S1-S2</sup>

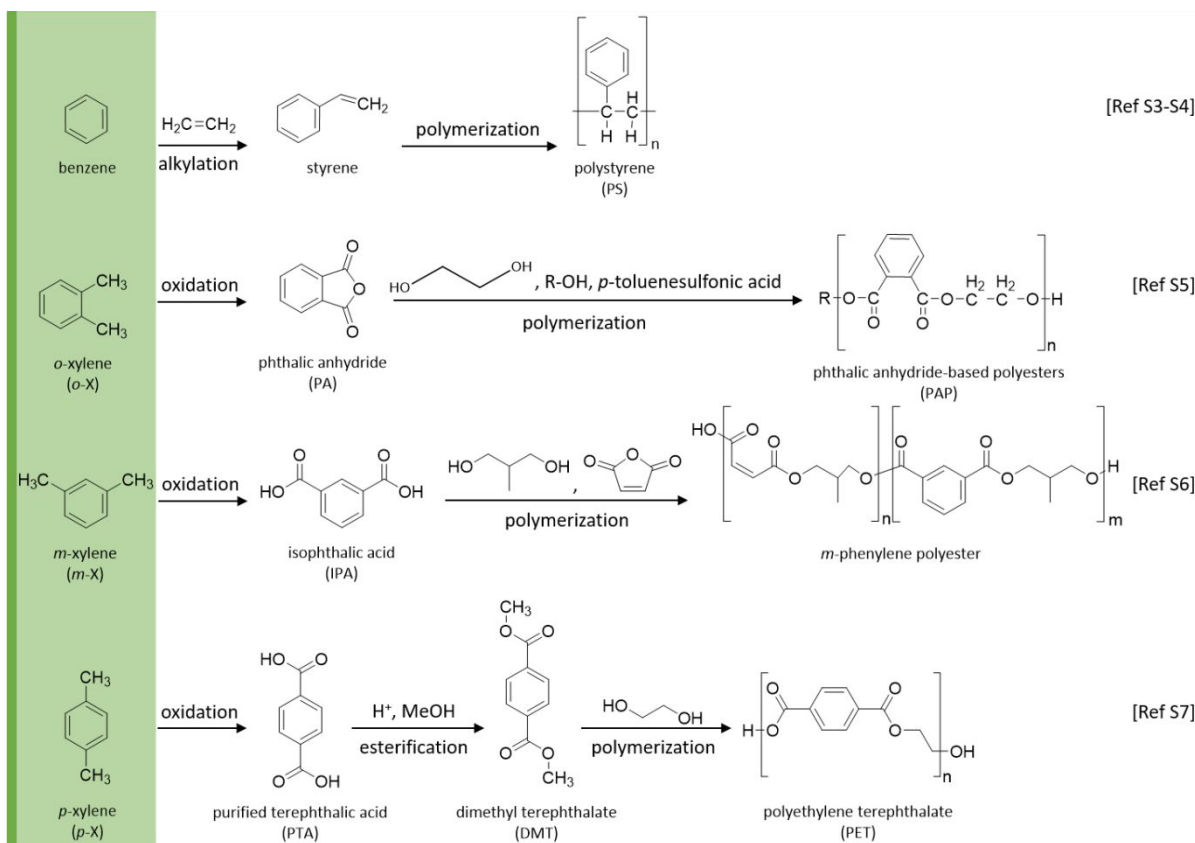

**Figure S2.** Synthesis of bio-based polymers from bio-based benzene and xylenes.<sup>S3-S7</sup>

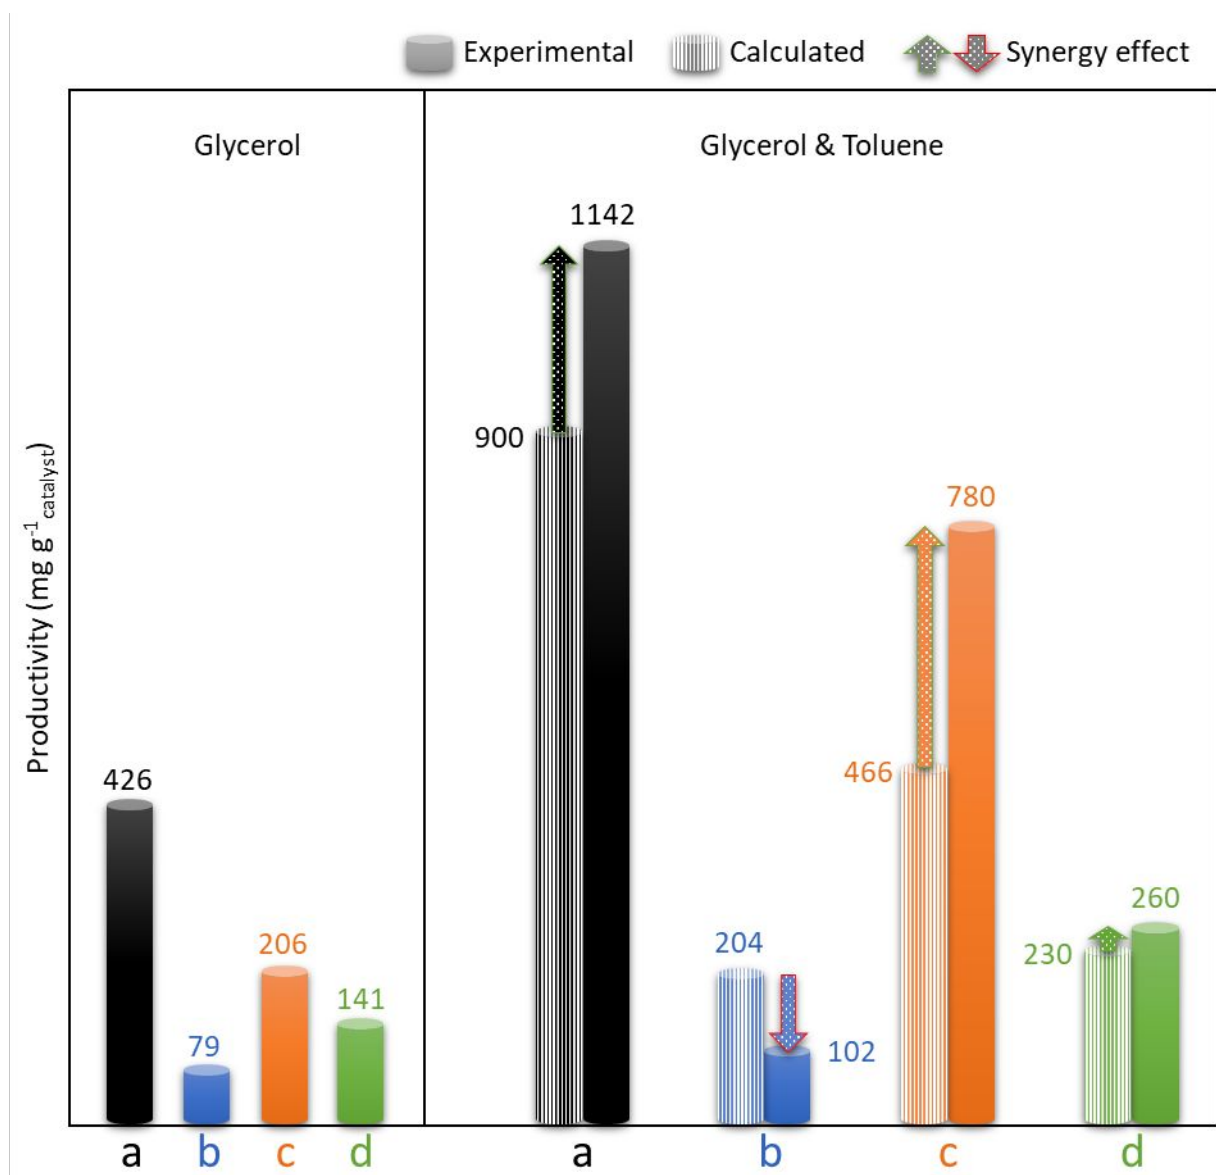

**Figure S3.** Productivity of (a) total BTX, (b) benzene, (c) toluene, and (d) xylenes on the catalyst during the first run for catalytic conversion of glycerol (left) and co-conversion of glycerol and toluene (93/7 wt.%, right). Reaction conditions: H-ZSM-5/Al<sub>2</sub>O<sub>3</sub> (60/40 wt.%) catalyst of 10 g, WHSV of the (co-)feeds of 1 h<sup>-1</sup>, N<sub>2</sub> flow of 50 ml min<sup>-1</sup>, reactor temperature of 550 °C, atmospheric pressure, and TOS of 8.5 h.



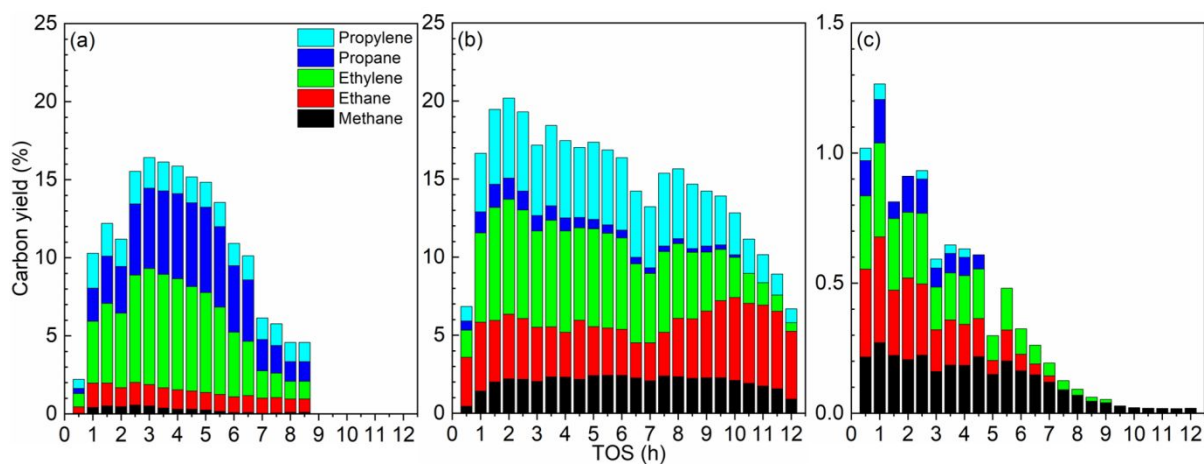

**Figure S4.** Carbon yields of low-molecular-weight hydrocarbons *versus* TOS for catalytic conversion of individual glycerol (a) and toluene (c), and catalytic co-conversion of glycerol and toluene (93/7 wt.%, b). Reaction conditions: H-ZSM-5/Al<sub>2</sub>O<sub>3</sub> (60/40 wt.%) catalyst of 10 g, WHSV of the (co-)feeds of 1 h<sup>-1</sup>, N<sub>2</sub> flow of 50 ml min<sup>-1</sup>, reactor temperature of 550 °C, and atmospheric pressure.

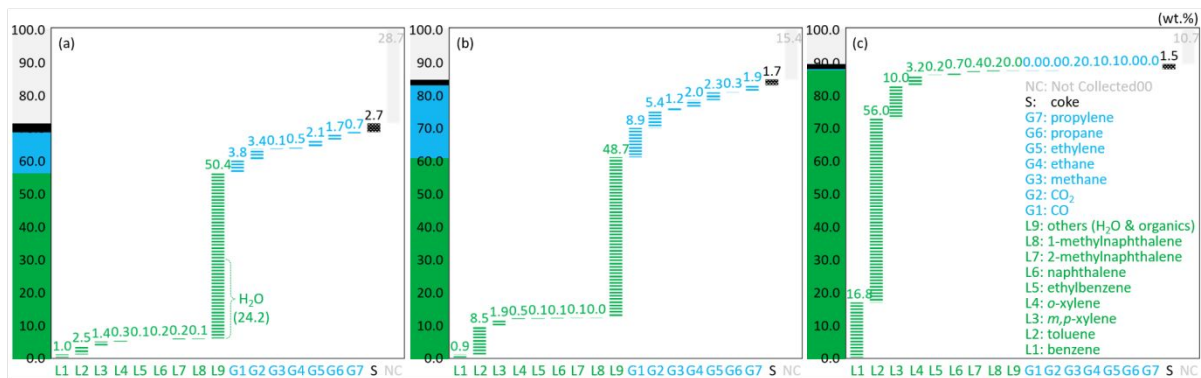

**Figure S5.** Mass balance for catalytic conversion of individual glycerol (a) and toluene (c), and catalytic co-conversion of glycerol and toluene (93/7 wt.%, b). Reaction conditions: H-ZSM-5/Al<sub>2</sub>O<sub>3</sub> (60/40 wt.%) catalyst of 10 g, WHSV of the (co-)feeds of 1 h<sup>-1</sup>, N<sub>2</sub> flow of 50 ml min<sup>-1</sup>, reactor temperature of 550 °C, and atmospheric pressure.

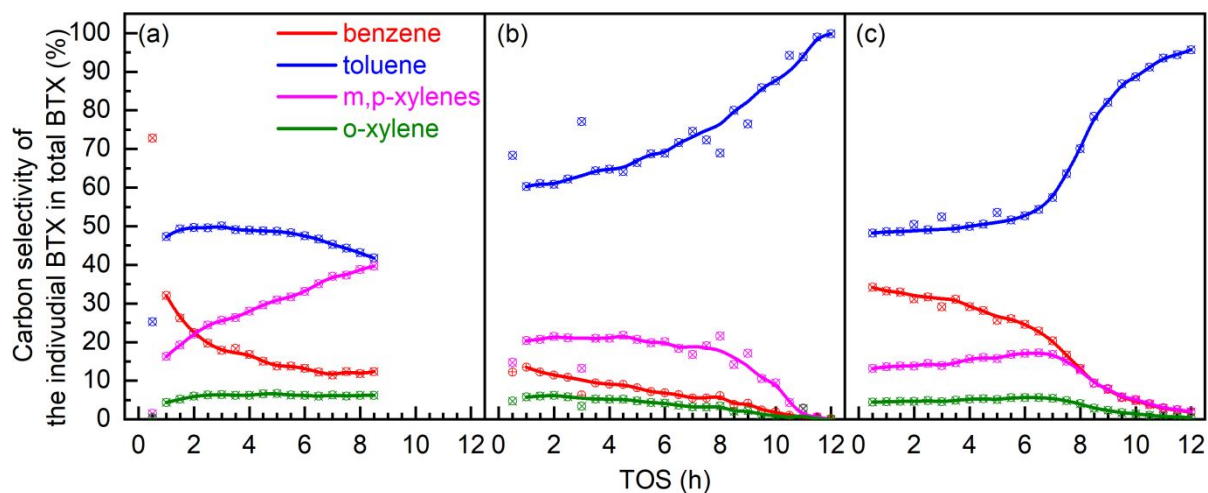

**Figure S6.** Carbon selectivity of the individual BTX in total BTX *versus* TOS for catalytic conversion of individual glycerol (a) and toluene (c), and catalytic co-conversion of glycerol and toluene (93/7 wt.%, b). Reaction conditions: H-ZSM-5/Al<sub>2</sub>O<sub>3</sub> (60/40 wt.%) catalyst of 10 g, WHSV of the (co-)feeds of 1 h<sup>-1</sup>, N<sub>2</sub> flow of 50 ml min<sup>-1</sup>, reactor temperature of 550 °C, and atmospheric pressure.

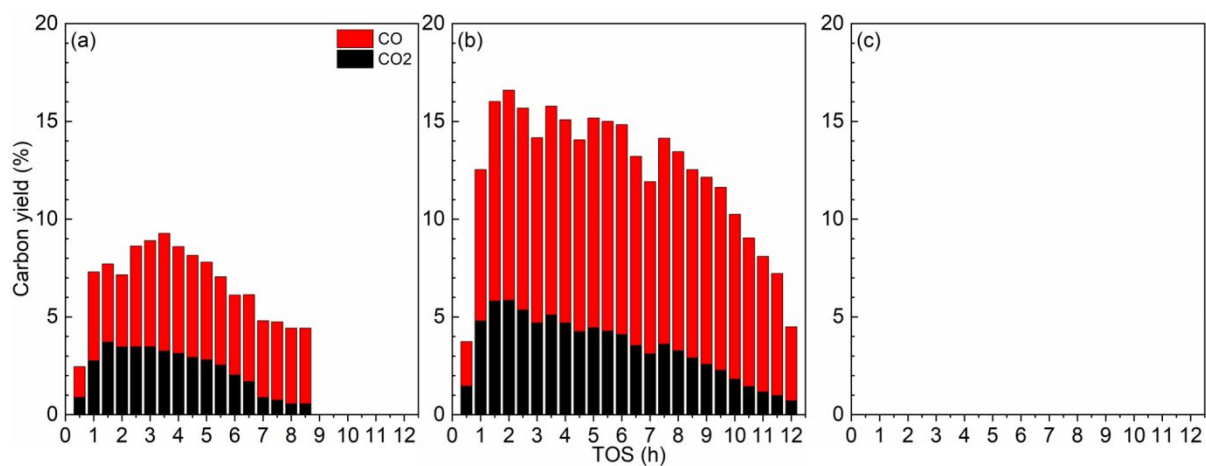

**Figure S7.** Carbon yields of CO and CO<sub>2</sub> versus TOS for catalytic conversion of individual glycerol (a) and toluene (c), and catalytic co-conversion of glycerol and toluene (93/7 wt.%, b).

Reaction conditions: H-ZSM-5/Al<sub>2</sub>O<sub>3</sub> (60/40 wt.%) catalyst of 10 g, WHSV of the (co-)feeds of 1 h<sup>-1</sup>, N<sub>2</sub> flow of 50 ml min<sup>-1</sup>, reactor temperature of 550 °C, and atmospheric pressure.

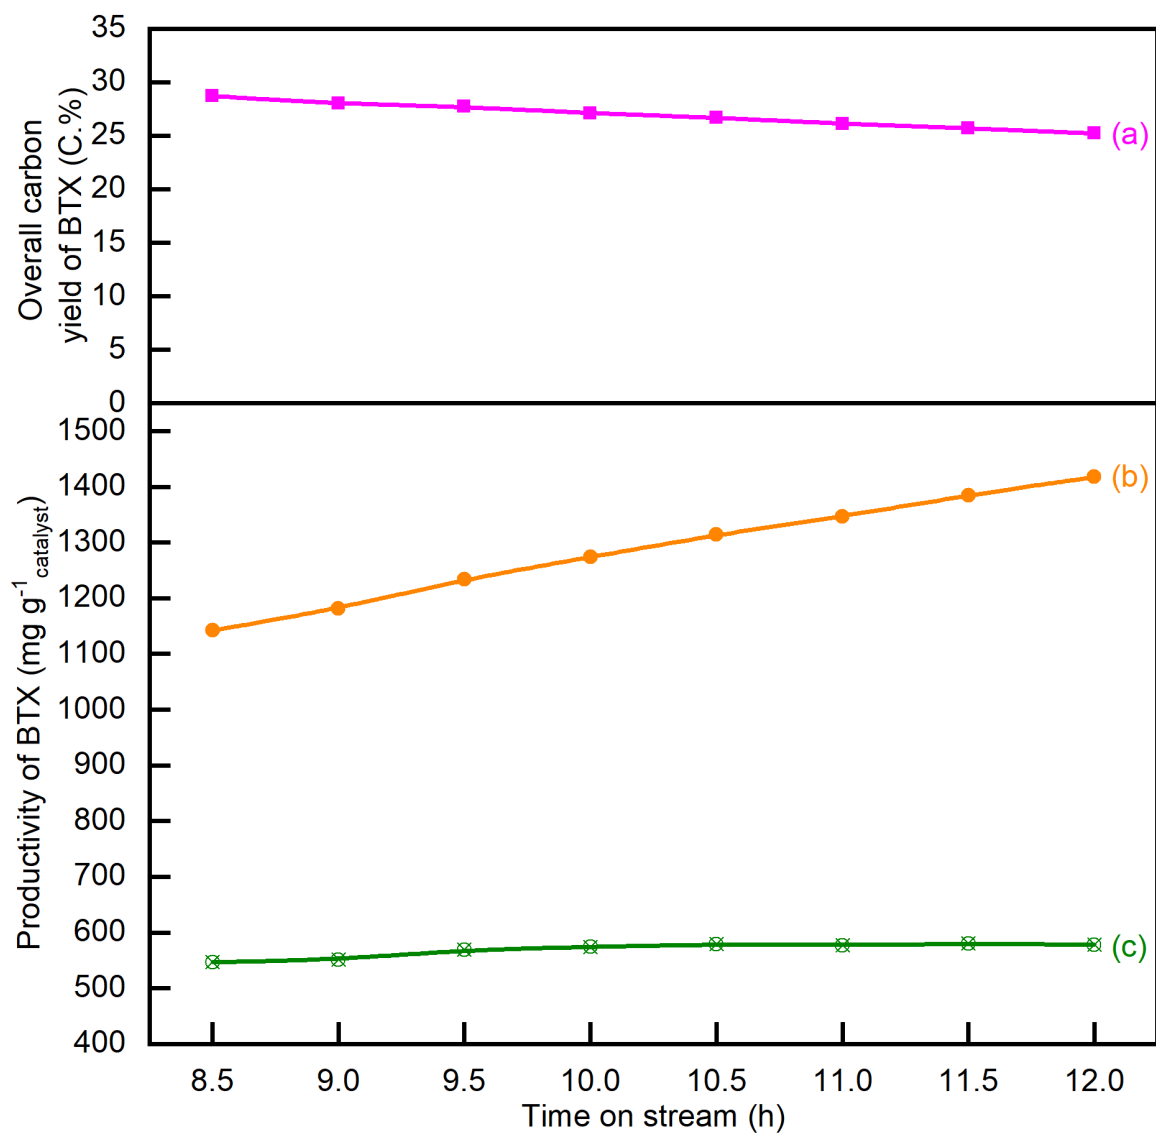

**Figure S8.** Overall BTX carbon yield (a), productivity of BTX on the catalyst during the first run including the toluene fraction for the recycle in co-feed (b), and productivity of BTX on the catalyst during the first run excluding the toluene fraction recycled in co-feed (c) for co-conversion of glycerol and toluene (93/7 wt.%). Reaction conditions: H-ZSM-5/Al<sub>2</sub>O<sub>3</sub> (60/40 wt.%), WHSV of co-feed of 1 h<sup>-1</sup>, N<sub>2</sub> flow of 50 ml min<sup>-1</sup>, reactor temperature of 550 °C, atmospheric pressure, and TOS varied from 8.5 to 12 h.

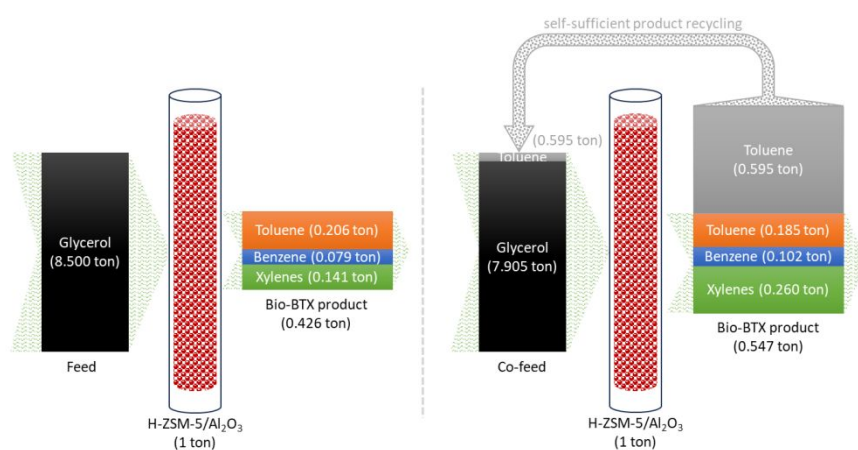

**Figure S9.** Enhanced production of bio-BTX aromatics (in particular xylenes) for catalytic conversion of glycerol (left) by self-sufficient toluene product recycling (right). Reaction conditions: H-ZSM-5/Al<sub>2</sub>O<sub>3</sub> (60/40 wt.%), WHSV of the (co-)feeds of 1 h<sup>-1</sup>, N<sub>2</sub> flow of 50 ml min<sup>-1</sup>, reactor temperature of 550 °C, atmospheric pressure, and TOS of 8.5 h.

## References

- S1. Ethanol Market and Pricing Data, [https://grains.org/ethanol\\_report/](https://grains.org/ethanol_report/), (accessed 27th October, 2023).
- S2. Petroleum & other liquids - Spot prices, [https://www.eia.gov/dnav/pet/pet\\_pri\\_spt\\_s1\\_w.htm](https://www.eia.gov/dnav/pet/pet_pri_spt_s1_w.htm), (accessed 27th October, 2023).
- S3. I-Shall, M. S.; Bahta, A.; Rabeony, H.; Reiss, H., Homogeneous gas phase thermal polymerization of styrene. *J. Chem. Phys.*, 1987, **87**, 1329-1345. (<https://doi.org/10.1063/1.453315>)
- S4. Vaughan, B. A.; Webster-Gardiner, M. S.; Cundari, T. R.; Gunnoe, T. B., A rhodium catalyst for single-step styrene production from benzene and ethylene. *Science*, 2015, **348**, 421-424. (<https://doi.org/doi:10.1126/science.aaa2260>)
- S5. Albu, P.; Vlase, G.; Modra, D.; Bolcu, C.; Vlase, T., Thermal behaviour of the polyesters obtained with different molar ratios of carboxyl hydroxyl components. *J. Therm. Anal. Calorim.*, 2015, **121**, 1031-1037. (<https://doi.org/10.1007/s10973-015-4783-x>)
- S6. Bartoli, M.; Rosi, L.; Frediani, M., Chapter 22 - Synthesis and Applications of Unsaturated Polyester Composites. In *Unsaturated Polyester Resins*, Thomas, S.; Hosur, M.; Chirayil, C. J., Eds. Elsevier: 2019; pp. 579-598. (<https://doi.org/10.1016/B978-0-12-816129-6.00022-3>)
- S7. Hwang, K.-R.; Jeon, W.; Lee, S. Y.; Kim, M.-S.; Park, Y.-K., Sustainable bioplastics: Recent progress in the production of bio-building blocks for the bio-based next-generation polymer PEF. *Chem. Eng. J.*, 2020, **390**, 124636. (<https://doi.org/https://doi.org/10.1016/j.cej.2020.124636>)
